# Supplementary material for: SARS-CoV-2 vaccination may mitigate dysregulation of IL-1/IL-18 and gastrointestinal symptoms of the post-COVID-19 condition
Source: Springer Nature journal article supplement (doi:10.1038/s41541-024-00815-1), 2024-02-05
Supplement: 41541_2024_815_MOESM1_ESM.pdf [file 41541_2024_815_MOESM1_ESM.pdf]

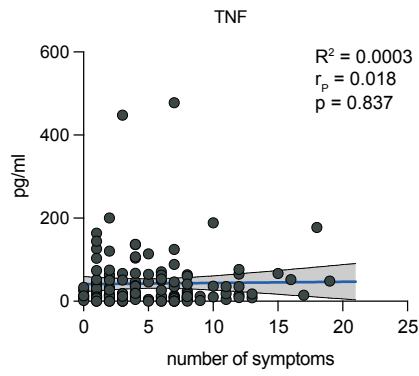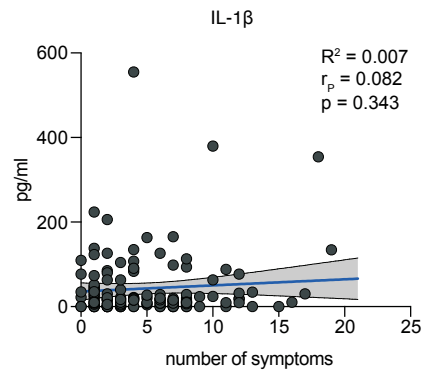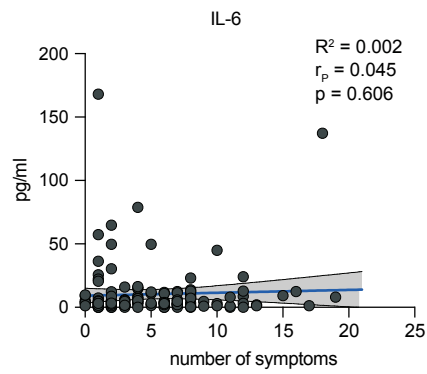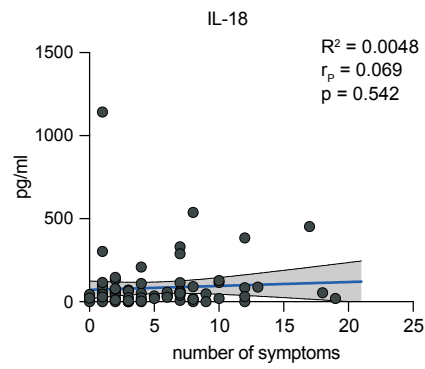

**Supplementary Figure 1. Cytokine levels relative to number of reported symptoms in patients with ongoing PCC.** Linear regression and Pearson correlation analysis for indicated plasma cytokine levels and number of symptoms reported in the online questionnaire of patients with ongoing PCC. Correlation coefficient  $R^2$ , Pearson correlation coefficients ( $r_p$ ) and  $p$  values are indicated.
